# Supplementary material for: Efficient photothermal catalytic methane dry reforming over rich oxygen vacancy catalysts
Source: Royal Society of Chemistry journal article supplement (doi:10.1039/d4cc05818f), 2025-01-01
Supplement: d4cc05818f1.pdf [file d4cc05818f1.pdf]

## Efficient photothermal catalytic methane dry reforming over rich oxygen vacancy catalysts

Lingxin Meng, Yuteng Jia, Shaowen Wu\*

School of Materials Science and Engineering, Shandong University of Science and Technology, Qingdao 266590, China. Email: [swwu@sdust.edu.cn](mailto:swwu@sdust.edu.cn)

### Experimental Section

#### Catalyst synthesis

**Catalyst Synthesis:** The Ni/La<sub>2</sub>Zr<sub>2</sub>O<sub>7</sub> was prepared by sol-gel method. La(NO<sub>3</sub>)<sub>3</sub>·6H<sub>2</sub>O, Zr(NO<sub>3</sub>)<sub>4</sub>·5H<sub>2</sub>O, citric acid and urea were dissolved in 30 ml of deionized water to form a precursor solution. The molar ratio of citric acid, urea and metal ions was 2:2:1. The solution was homogeneously mixed and dried at 100°C until a gel was formed. The gel was then calcined at 800°C for 3 h to obtain La<sub>2</sub>Zr<sub>2</sub>O<sub>7</sub>. Ni(NO<sub>3</sub>)<sub>2</sub> solution and La<sub>2</sub>Zr<sub>2</sub>O<sub>7</sub> (Ni/(La+Zr)=0.1) were mixed and dried at 180°C. The powder was then calcined at 500°C for 4 h and reduced by 5 vol% H<sub>2</sub>/Ar (30 ml min<sup>-1</sup>) at 700 °C for 1 h to obtain 10% Ni/La<sub>2</sub>Zr<sub>2</sub>O<sub>7</sub>. Samples of Ni nanoparticles loaded on La<sub>2</sub>O<sub>3</sub> and ZrO<sub>2</sub> (10% Ni/La<sub>2</sub>O<sub>3</sub> and 10% Ni/ZrO<sub>2</sub>) were prepared using the same method. Ni nanoparticles loaded on TiO<sub>2</sub> (10%Ni/TiO<sub>2</sub>) and SiO<sub>2</sub> (10%Ni/SiO<sub>2</sub>) were prepared by impregnation method

#### Characterization:

The X-ray diffraction (XRD) patterns of the samples were obtained using a RigakuDmax X-ray diffractometer. A JEM-ARM200F electron microscope equipped with energy dispersive X-ray spectroscopy (EDX) was used to obtain transmission electron microscopy (TEM) and elemental mapping images. An inductively coupled plasma/optical emission spectroscopy (ICP-OES, Optima 4300DV) was used to determine elemental compositions. Diffuse absorption spectra were measured using a uv-3600i plus spectrophotometer. XPS spectra were measured using an X-ray photoelectron spectrometer (ESCALAB 250Xi). Thermogravimetric analysis was performed using an STA449F3 thermal analyzer. Raman spectra were obtained on a Renishaw in Via Raman microscope using 514.5 nm excitation. Electron paramagnetic resonance (EPR) measurements were performed by a Bruker ELEXSYS-II E500. Temperature programmed reactions were conducted on a multifunctional adsorption apparatus (TP-5080) by using a quartz tubular reactor that was linked with a quartz window.

Temperature programmed reduction of H<sub>2</sub> (H<sub>2</sub>—TPR). 50 mg samples were placed in a reaction tube and treated with He gas (50 ml min<sup>-1</sup>) at 300 °C for 1 h to remove adsorbed water and gases. The sample was cooled to 50 °C and then heated to 900 °C with a 10% H<sub>2</sub>/He gas mixture at 10 °C min<sup>-1</sup>. The effluent was detected using TCD.

Temperature programmed desorption of CO<sub>2</sub> (CO<sub>2</sub>—TPD). CO<sub>2</sub>-TPD was performed in a multifunctional adsorption apparatus connected to an online mass spectrometer. 50 mg of sample was added to the reaction tube and treated with He gas (50 ml min<sup>-1</sup>) at 300 °C for 1 h to remove adsorbed water and gas. After cooling to ambient temperature, the gas flow rate was changed to 10% CO<sub>2</sub>/He (50 ml min<sup>-1</sup>), and the sample was pre-adsorbed for 1 h. The gas flow was switched to He gas (50 ml min<sup>-1</sup>) for 30 min to remove the weakly adsorbed CO<sub>2</sub> on the surface. The sample was heated up to 800 °C with a He gas stream (50 ml min<sup>-1</sup>) at 10 °C min<sup>-1</sup>. Simultaneously, the outflow gas was recorded by an on-line mass spectrometer.

Temperature programmed disproportionation reaction (CO —TPD). 8 mg sample was reduced in situ at 700°C with a flow of 5% H<sub>2</sub>/Ar. After cooling to ambient temperature, the reactor was cleaned with a stream of 5% CO/He (30 ml min<sup>-1</sup>). The reactor was then heated to 700 °C at 10°C

min<sup>-1</sup>.

Temperature programmed desorption of CH<sub>4</sub> (CH<sub>4</sub>-TPD). 8 mg of sample was added to the reaction tube and treated with He gas (50 ml min<sup>-1</sup>) at 300 °C for 1 h to remove adsorbed water and gas. After cooling to ambient temperature, the gas flow rate was changed to 10% CH<sub>4</sub>/He (50 ml min<sup>-1</sup>), and the sample was pre-adsorbed for 1 h. The gas flow was switched to He gas (50 ml min<sup>-1</sup>) for 30 min to remove the weakly adsorbed CH<sub>4</sub> on the surface. The sample was heated up to 800 °C with a He gas stream (50 ml min<sup>-1</sup>) at 10 °C min<sup>-1</sup> under dark and light illuminated. Simultaneously, the outflow gas was recorded by an on-line mass spectrometer.

Temperature programmed desorption of H<sub>2</sub> (H<sub>2</sub>-TPD). 8 mg of sample was added to the reaction tube and treated with He gas (50 ml min<sup>-1</sup>) at 300 °C for 1 h to remove adsorbed water and gas. After cooling to ambient temperature, the gas flow rate was changed to 10% H<sub>2</sub>/He (50 ml min<sup>-1</sup>), and the sample was pre-adsorbed for 1 h. The gas flow was switched to He gas (50 ml min<sup>-1</sup>) for 30 min to remove the weakly adsorbed H<sub>2</sub> on the surface. The sample was heated up to 800 °C with a He gas stream (50 ml min<sup>-1</sup>) at 10 °C min<sup>-1</sup> under dark and light illuminated. Simultaneously, the outflow gas was recorded by an on-line mass spectrometer.

#### **Catalytic Performance Evaluation:**

Thermal catalytic DRM Tests: The thermal catalytic activities of 10% Ni/La<sub>2</sub>Zr<sub>2</sub>O<sub>7</sub>, 10% Ni/La<sub>2</sub>O<sub>3</sub> and 10% Ni/ZrO<sub>2</sub> were determined on a fixed-bed reactor. A mixture of 50 mg of samples and 300 mg of quartz sand were placed on a quartz cotton support in the middle of the quartz reactor. Samples were reduced in situ with 5 vol% H<sub>2</sub>/Ar at 700 °C for 1 h at a flow rate of 30.0 ml min<sup>-1</sup>, and then switched to a gas mixture of 10.0/10.0/80.0 vol% CH<sub>4</sub>/CO<sub>2</sub>/Ar to determine the thermal catalytic activity from 700 °C to 400 °C. During the test, the temperature of the reaction was controlled by a tubular electric furnace. Concentrations of reactants and products were determined by a GC-9560 gas chromatograph. The DRM activity of 10% Ni/La<sub>2</sub>Zr<sub>2</sub>O<sub>7</sub> was carried out at different temperatures under dark or focused irradiation on a stationary reactor with a quartz window on the top. Here, 10 mg of the sample was reduced in situ with 5 vol% H<sub>2</sub>/Ar at 700 °C for 1 h. After reduction by H<sub>2</sub>, the gas mixture was switched to 10.0/10.0/ 80.0 vol% CH<sub>4</sub>/CO<sub>2</sub>/Ar for DRM at different temperatures in the dark or under focused irradiation.

Photothermal catalytic DRM tests: Activity tests of 10% Ni/La<sub>2</sub>Zr<sub>2</sub>O<sub>7</sub>, 10% Ni/La<sub>2</sub>O<sub>3</sub> and 10% Ni/ZrO<sub>2</sub> were carried out in a customized quartz-windowed reactor, and the stability of the first three was determined. 10 mg of the sample was taken in a quartz window reactor, and the surface of the sample was irradiated with light from a 500W xenon lamp focused by a convex lens. The samples were reduced in situ with 5 vol% H<sub>2</sub>/Ar at 700 °C for 1 h at a flow rate of 90.0 ml min<sup>-1</sup>, and then switched to a gas mixture of 20.0/20.0/60.0 vol% CH<sub>4</sub>/CO<sub>2</sub>/Ar for photothermal catalytic DRM.

Photocatalytic DRM tests: The reactor was placed in an ice water to maintain a mild temperature for testing the photocatalytic activity of the samples.

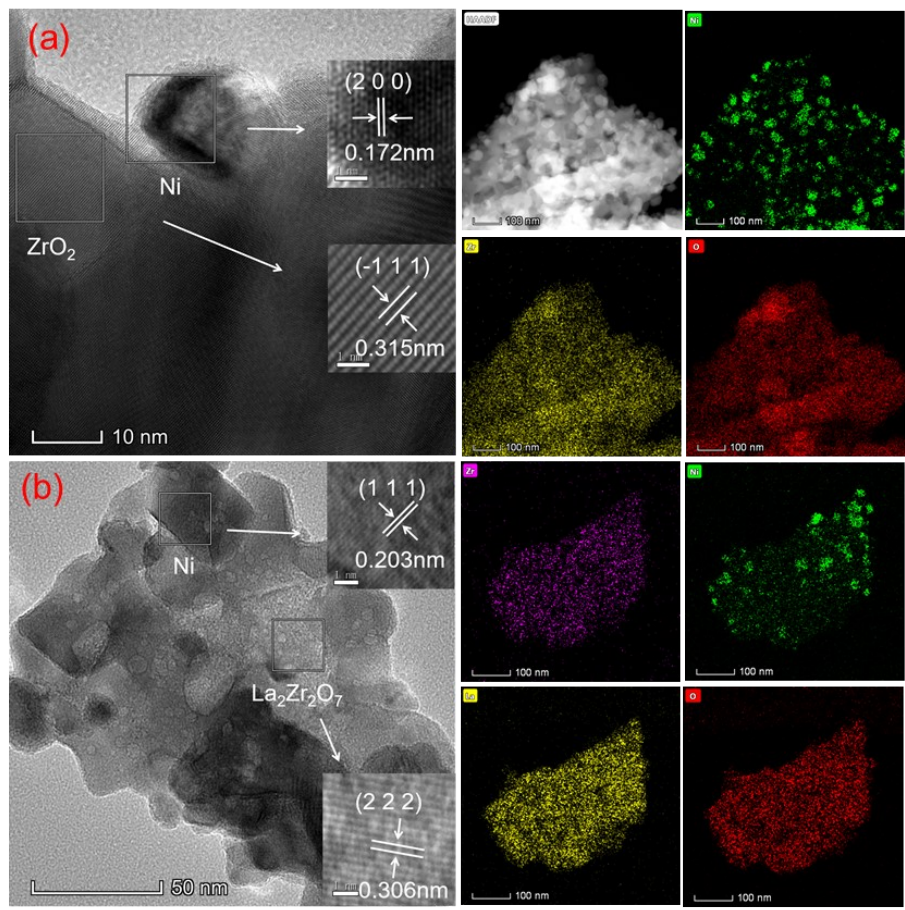

Fig. S1 TEM image, HRTEM image and the elemental mapping images of 10Ni/ZrO<sub>2</sub> (a) and 10Ni/La<sub>2</sub>Zr<sub>2</sub>O<sub>7</sub> (b).

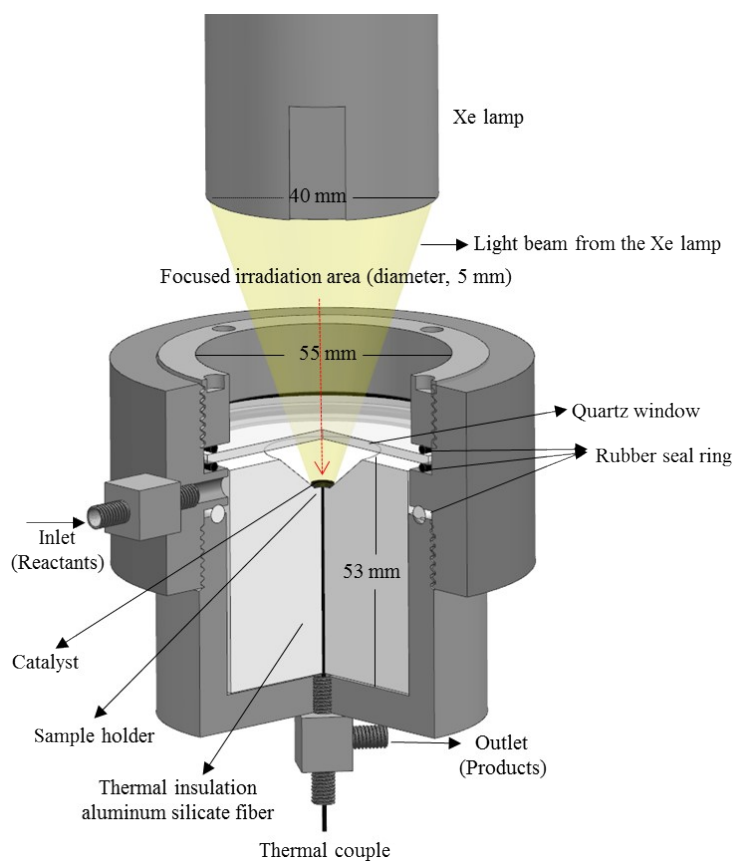

Scheme S1. Schematic illustration of a stainless steel photothermal reactor for conducting DRM.

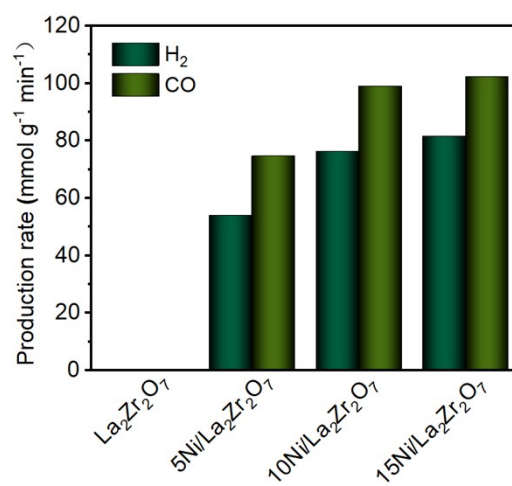

Fig. S2 Photothermal activity of La<sub>2</sub>Zr<sub>2</sub>O<sub>7</sub> with different Ni loadings.

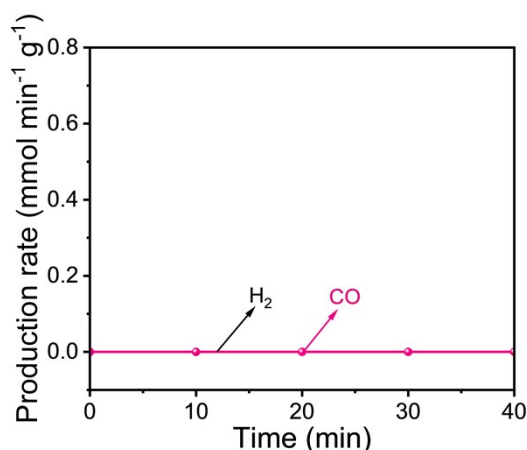

Fig. S3 Time course of  $P_{H_2}$  and  $P_{CO}$  for photocatalytic DRM on 10Ni/TiO<sub>2</sub>

Table S1 Comparison of photothermal catalytic performance of DRM reactions

| Entry | Sample                               | Photothermal temperature | Conditions                                                                                                                            | Production rates of CO and H <sub>2</sub> ( $P_{CO}$ and $P_{H_2}$ )                                                  | Stability | Carbon deposition rate                                                                   | Ref.                                        |
|-------|--------------------------------------|--------------------------|---------------------------------------------------------------------------------------------------------------------------------------|-----------------------------------------------------------------------------------------------------------------------|-----------|------------------------------------------------------------------------------------------|---------------------------------------------|
| 1     | 10Ni/La <sub>2</sub> O <sub>3</sub>  | 728°C                    | 385 kW m <sup>-2</sup> ; 20.0 vol% CH <sub>4</sub> - 20.0 vol % CO <sub>2</sub> - 60.0 vol% Ar; Total feed flow rate is 90 mL/min     | $P_{CO}$ = 81.035 mmol g <sup>-1</sup> min <sup>-1</sup><br>$P_{H_2}$ = 59.611 mmol g <sup>-1</sup> min <sup>-1</sup> | 50 h      | $8.12 \times 10^{-4}$ g <sub>c</sub> h <sup>-1</sup> g <sub>catalyst</sub> <sup>-1</sup> | This work                                   |
| 2     | Co/Al <sub>2</sub> O <sub>3</sub>    | 665°C                    | 353.9 kW m <sup>-2</sup> ; 30.0 vol% CH <sub>4</sub> - 29.3 vol % CO <sub>2</sub> - 40.7 vol% Ar; Total feed flow rate is 89.2 mL/min | $P_{CO}$ = 37.97 mmol g <sup>-1</sup> min <sup>-1</sup><br>$P_{H_2}$ = 31.42 mmol g <sup>-1</sup> min <sup>-1</sup>   | 4h        | $1.65 \times 10^{-1}$ g <sub>c</sub> h <sup>-1</sup> g <sub>catalyst</sub> <sup>-1</sup> | Energy Environ. Sci., 2019, 12, 2581–2590   |
| 3     | Co/Co-Al <sub>2</sub> O <sub>3</sub> | 697°C                    | 353.9 kW m <sup>-2</sup> ; 30.0 vol% CH <sub>4</sub> - 29.3 vol % CO <sub>2</sub> - 40.7 vol% Ar; Total feed flow rate is 89.2 mL/min | $P_{CO}$ = 43.46 mmol g <sup>-1</sup> min <sup>-1</sup><br>$P_{H_2}$ = 39.42 mmol g <sup>-1</sup> min <sup>-1</sup>   | 70h       | $2.4 \times 10^{-2}$ g <sub>c</sub> h <sup>-1</sup> g <sub>catalyst</sub> <sup>-1</sup>  | Energy Environ. Sci., 2019, 12, 2581–2590   |
| 4     | SCM-Ni/SiO <sub>2</sub>              | 646°C                    | 343.6 kW m <sup>-2</sup> ; 11.7 vol% CH <sub>4</sub> - 11.5 vol% CO <sub>2</sub> - 76.8 vol% Ar; Total feed flow rate is 118.7 mL/min | $P_{CO}$ = 19.9 mmol g <sup>-1</sup> min <sup>-1</sup><br>$P_{H_2}$ = 17.1 mmol g <sup>-1</sup> min <sup>-1</sup>     | 100h      | /                                                                                        | Adv. Energy Mater., 2018, 8, 1702472        |
| 5     | Ni/CeO <sub>2</sub>                  | 807°C                    | 363.4 kW m <sup>-2</sup> ; 9.8 vol% CH <sub>4</sub> - 10.0 vol% CO <sub>2</sub> - 80.2 vol% Ar; Total feed flow rate is 122 mL/min    | $P_{CO}$ = 6.27 mmol g <sup>-1</sup> min <sup>-1</sup><br>$P_{H_2}$ = 6.53 mmol g <sup>-1</sup> min <sup>-1</sup>     | 100 h     | $1.25 \times 10^{-2}$ g <sub>c</sub> h <sup>-1</sup> g <sub>catalyst</sub> <sup>-1</sup> | Appl. Catal. B-Environ., 2018, 239, 555–564 |
| 6     | 1.0 wt% Pt/                          | 767°C                    | 371.1 kW m <sup>-2</sup> ; 10.2 vol%                                                                                                  | $P_{CO}$ = 5.7 mmol g <sup>-1</sup> min <sup>-1</sup>                                                                 | 100h      | /                                                                                        | Green Chem.,                                |

|    |                                                                    |        |                                                                                                                |                                                                                                                                        |     |                                                                                                  |  |                                                      |
|----|--------------------------------------------------------------------|--------|----------------------------------------------------------------------------------------------------------------|----------------------------------------------------------------------------------------------------------------------------------------|-----|--------------------------------------------------------------------------------------------------|--|------------------------------------------------------|
|    | CeO <sub>2</sub> -MNR                                              |        | CH <sub>4</sub> - 10.2 vol% CO <sub>2</sub> –<br>79.6 vol% Ar; Total feed<br>flow rate is 120.5<br>mL/min      | mmol g <sup>-1</sup> min <sup>-1</sup><br>P <sub>H2</sub> = 6.0<br>mmol g <sup>-1</sup> min <sup>-1</sup>                              |     |                                                                                                  |  | 2018, 20,<br>2857–2869                               |
| 7  | 10Ni/Al <sub>2</sub> O <sub>3</sub>                                | 550°C  | 1.07 W cm <sup>-2</sup> ; Total feed<br>flow rate is 20.0 mL/min<br>(CH <sub>4</sub> /CO <sub>2</sub> = 1:1)   | P <sub>CO</sub> = 130<br>umol g <sup>-1</sup> min <sup>-1</sup><br>P <sub>H2</sub> = 120<br>umol g <sup>-1</sup> min <sup>-1</sup>     | /   | /                                                                                                |  | Appl. Catal. B-<br>Environ., 2017,<br>209, 183–189   |
| 8  | Pt-Au/SiO <sub>2</sub>                                             | 400°C; | 0.6 W cm <sup>-2</sup> ; Total feed<br>flow rate is 20.0 mL/min<br>(CH <sub>4</sub> /CO <sub>2</sub> = 1:1)    | P <sub>CO</sub> = 120<br>umol g <sup>-1</sup> min <sup>-1</sup><br>P <sub>H2</sub> = 90<br>umol g <sup>-1</sup> min <sup>-1</sup>      | 6h  | /                                                                                                |  | ACS Appl.<br>Mater. Inter.,<br>2018, 10, 408–<br>416 |
| 9  | Ni <sub>5</sub> Cu <sub>5</sub> /Al <sub>2</sub><br>O <sub>3</sub> | 748°C  | 20.0 vol% CH <sub>4</sub> - 20 vol%<br>CO <sub>2</sub> – 60.0 vol% Ar;<br>Total feed flow rate is 90<br>mL/min | P <sub>CO</sub> = 40.45<br>mmol g <sup>-1</sup> min <sup>-1</sup><br>P <sub>H2</sub> = 31.80<br>mmol g <sup>-1</sup> min <sup>-1</sup> | 50h | 4.70 × 10 <sup>-3</sup><br>g <sub>c</sub> h <sup>-1</sup><br>g <sub>catalyst</sub> <sup>-1</sup> |  | Catal Sci<br>Technol, 2023,<br>13,2500-2507          |
| 10 | Ni <sub>5</sub> Cu <sub>2</sub> /Al <sub>2</sub><br>O <sub>3</sub> | 739°C  | 20.0 vol% CH <sub>4</sub> - 20 vol%<br>CO <sub>2</sub> – 60.0 vol% Ar;<br>Total feed flow rate is 90<br>mL/min | P <sub>CO</sub> = 63.80<br>mmol g <sup>-1</sup> min <sup>-1</sup><br>P <sub>H2</sub> = 61.69<br>mmol g <sup>-1</sup> min <sup>-1</sup> | 50h | 4.56 × 10 <sup>-4</sup><br>g <sub>c</sub> h <sup>-1</sup><br>g <sub>catalyst</sub> <sup>-1</sup> |  | Catal Sci<br>Technol, 2023,<br>13,2500-2507          |

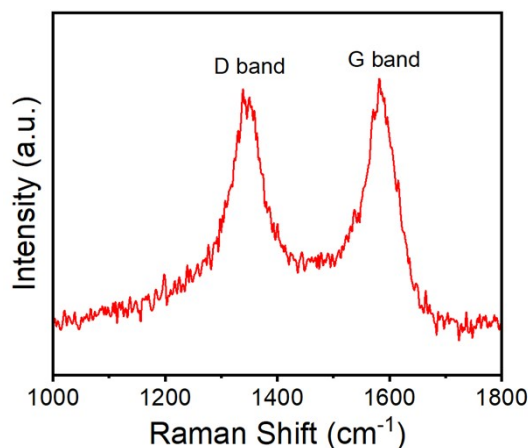

Fig. S4 Raman spectra of the used 10Ni/La<sub>2</sub>Zr<sub>2</sub>O<sub>7</sub>.

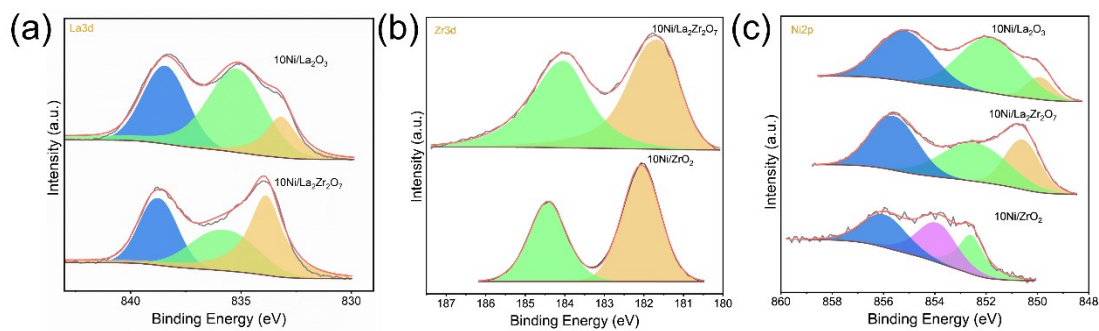

Fig. S5 XPS spectra of La 3d (a), Zr 3d (b), Ni 2p (c).

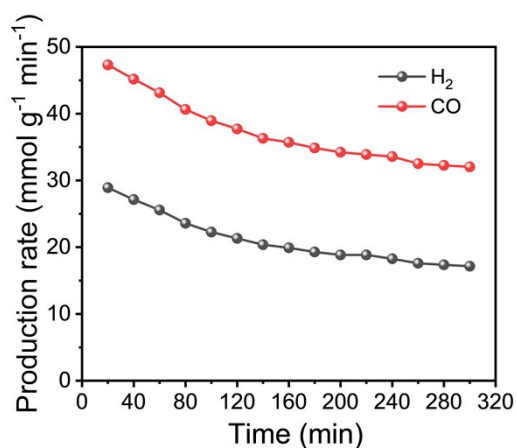

Fig. S6 Time course of P<sub>H<sub>2</sub></sub> and P<sub>CO</sub> for thermal catalytic DRM on 10Ni/SiO<sub>2</sub>.

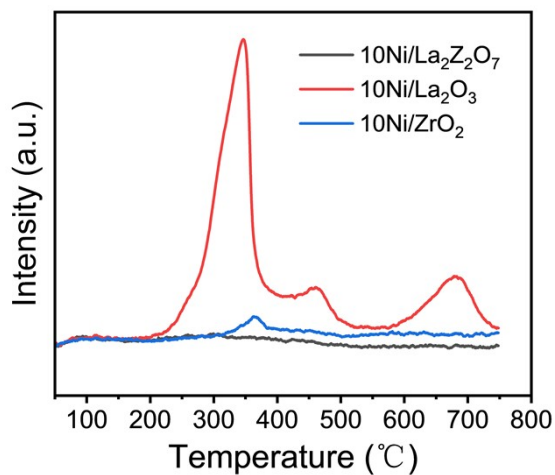

Fig. S7 CH<sub>4</sub>-TPD of 10Ni/La<sub>2</sub>O<sub>3</sub>, 10Ni/ZrO<sub>2</sub> and 10Ni/La<sub>2</sub>Zr<sub>2</sub>O<sub>7</sub>.

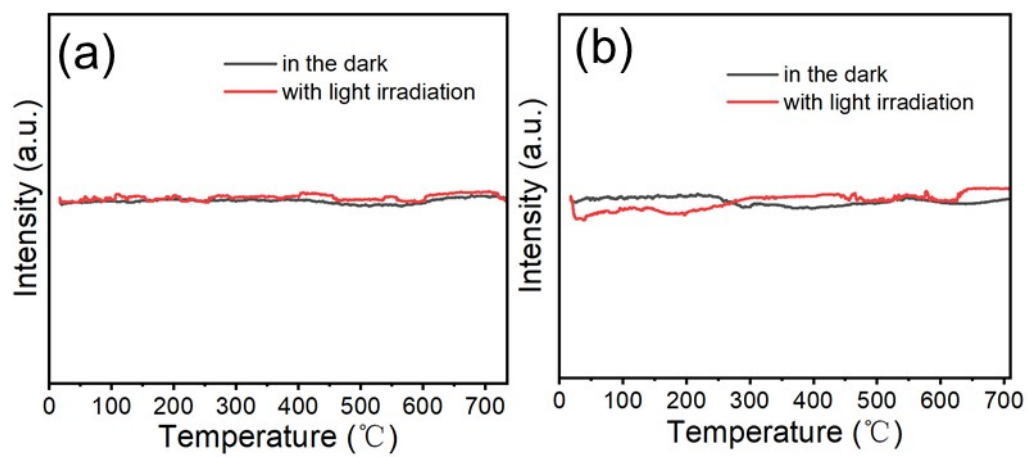

Fig. S8 CO-TPD (a) and H<sub>2</sub>-TPD (b) of 10Ni/La<sub>2</sub>O<sub>3</sub> in the dark and upon light irradiation.
